# Supplementary material for: Effects of Photobiomodulation on Oral Mucositis: Visualization and Analysis of Knowledge
Source: MDPI journal article supplement (doi:10.3390/life12111940), 2022-11-21
Supplement: s1 [file s1]

**Supplementary Table S1.** The 50 most cited papers on the effect of photobiomodulation on oral mucositis

| Rank | Article Title                                                                                                                                              | Author Name                   | Times Cited (Citation average) |            |                | DOI                           | Study design                         | Abstract                                                                                                                                                 |
|------|------------------------------------------------------------------------------------------------------------------------------------------------------------|-------------------------------|--------------------------------|------------|----------------|-------------------------------|--------------------------------------|----------------------------------------------------------------------------------------------------------------------------------------------------------|
|      |                                                                                                                                                            |                               | WoS-CC                         | Scopus     | Google Scholar |                               |                                      |                                                                                                                                                          |
| 1    | Low-energy He Ne laser in the prevention of radiation-induced mucositis - A multicenter phase III randomized study in patients with head and neck cancer   | Bensadoun, R.J. et al. (1999) | 157 (7,1)                      | 204 (9,1)  | 373 (16,9)     | 10.1007/s005209900034         | Randomized clinical trial            | Evaluation of the use of low-level laser as prevention of oral mucositis in patients with head and neck cancer. Multicenter, randomized phase III study. |
| 2    | Low energy helium-neon laser in the prevention of oral mucositis in patients undergoing bone marrow transplant: Results of a double blind randomized trial | Cowen, D. et al. (1997)       | 150 (6,2)                      | 188 (7,8)  | 322 (13,4)     | 10.1016/s0360-3016(97)00076-x | Randomized clinical trial            | Evaluation of low energy helium-neon laser in the prevention of oral mucositis in patients undergoing bone marrow transplantation.                       |
| 3    | A systematic review with meta-analysis of the effect of low-level laser therapy (LLLT) in cancer therapy-induced oral mucositis                            | Bjordal, J.M. et al. (2011)   | 149 (14,6)                     | -          | 338 (30,5)     | 10.1007/s00520-011-1202-0     | Systematic Review with Meta-analysis | Systematic review addressing the action of low-level laser therapy in oral mucositis therapy.                                                            |
| 4    | Systematic review of laser and other light therapy for the management of oral                                                                              | Migliorati, C. et al. (2013)  | 136 (16,7)                     | 162 (19,8) | 275 (32,6)     | 10.1007/s00520-012-1605-6     | Systematic Review with Meta-         | Systematic review addressing the use of low-level laser therapy as a therapy for oral mucositis.                                                         |

| mucositis in cancer patients |                                                                                                                                                                                                                           |                             |            |            |            |                              | analysis                  |                                                                                                                                                                                            |
|------------------------------|---------------------------------------------------------------------------------------------------------------------------------------------------------------------------------------------------------------------------|-----------------------------|------------|------------|------------|------------------------------|---------------------------|--------------------------------------------------------------------------------------------------------------------------------------------------------------------------------------------|
| 5                            | A phase III randomized double-blind placebo-controlled clinical trial to determine the efficacy of low-level laser therapy for the prevention of oral mucositis in patients undergoing hematopoietic cell transplantation | Schubert, MM. et al. (2007) | 132 (9,2)  | 160 (11,3) | 275 (19,3) | 10.1007/s00520-007-0238-7    | Randomized clinical trial | Randomized clinical trial evaluating the efficacy of low level laser therapy in the treatment of oral mucositis in hematopoietic cell transplant patients.                                 |
| 6                            | Low-level laser therapy/photobiomodulation in the management of side effects of chemoradiation therapy in head and neck cancer: part 2: proposed applications and treatment protocols                                     | Zecha, JAEM. et al. (2016)  | 109 (21,2) | 123 (23,4) | 180 (34,6) | 10.1007/s00520-016-3153-y    | Literature review         | Literature review with a proposal for a protocol for the application of low level laser therapy in the treatment of oral mucositis in patients undergoing chemotherapy and radiotherapy.   |
| 7                            | Low level laser therapy/photobiomodulation in the management of side effects of chemoradiation therapy in head and neck cancer: part 1: mechanisms of action, dosimetric, and safety considerations                       | Zecha, JAEM. et al. (2016)  | 100 (19,4) | 111 (21,2) | 171 (32,8) | 10.1007/s00520-016-3152-z    | Literature review         | Literature review that addresses the mechanism of action, dosimetry and safety issues of low-level laser therapy in the treatment of oral mucositis in patients with head and neck cancer. |
| 8                            | Low-power laser in the prevention of induced oral mucositis in bone marrow transplantation patients: a randomized trial                                                                                                   | Antunes, HS. et al. (2007)  | 97 (6,9)   | 107 (7,6)  | 180 (12)   | 10.1182/blood-2006-07-035022 | Randomized clinical trial | Randomized clinical study evaluating low-level laser therapy as a treatment for oral mucositis in bone marrow transplant patients.                                                         |

|    |                                                                                                                                                                 |                              |           |            |            |                                    |                                      |                                                                                                                                          |
|----|-----------------------------------------------------------------------------------------------------------------------------------------------------------------|------------------------------|-----------|------------|------------|------------------------------------|--------------------------------------|------------------------------------------------------------------------------------------------------------------------------------------|
| 9  | Effect of Prophylactic Low Level Laser Therapy on Oral Mucositis: A Systematic Review and Meta-Analysis                                                         | Oberoi, S. et al. (2014)     | 95 (13,2) | 101 (14,2) | 195 (26,7) | 10.1371/journal.pone.0107418       | Systematic Review with Meta-analysis | Systematic review with meta-analysis that addresses the prophylactic use of low-level laser therapy in the prevention of oral mucositis. |
| 10 | Systematic review of photobiomodulation for the management of oral mucositis in cancer patients and clinical practice guidelines                                | Zadik, Y. et al. (2019)      | 93 (42)   | 107 (46)   | 159 (71)   | 10.1007/s00520-019-04890-2         | Systematic Review                    | Systematic review that addresses low-level laser therapy guidelines in the treatment of oral mucositis.                                  |
| 11 | Laser Phototherapy as Topical Prophylaxis Against Head and Neck Cancer Radiotherapy-Induced Oral Mucositis: Comparison Between Low and High/Low Power Lasers    | Simoes, A. et al. (2009)     | 70 (5,8)  | 77 (6,2)   | 134 (11,1) | 10.1002/lsm.20758                  | Randomized clinical trial            | Randomized clinical study comparing low-level laser therapy with high-frequency laser therapy in the treatment of oral mucositis.        |
| 12 | Could the biological robustness of low level laser therapy (Photobiomodulation) impact its use in the management of mucositis in head and neck cancer patients  | Sonis, ST. et al. (2016)     | 70 (13,8) | -          | 102 (19,8) | 10.1016/j.oraloncology.2016.01.005 | Literature review                    | Literature review evaluating the photobiomodulatory action of low-level laser therapy in the treatment of oral mucositis.                |
| 13 | Low-level laser therapy in the prevention and treatment of cancer therapy-induced mucositis: 2012 state of the art based on literature review and meta-analysis | Bensadoun, RJ. et al. (2012) | 68 (7,4)  | 85 (9,2)   | 155 (15,3) | 10.1097/CCO.0b013e328352eaa3       | Literature review                    | Literature review evaluating low-level laser therapy in the prevention and treatment of oral mucositis.                                  |

|    |                                                                                                                                                             |                             |          |          |            |                               |                           |                                                                                                                                                                             |
|----|-------------------------------------------------------------------------------------------------------------------------------------------------------------|-----------------------------|----------|----------|------------|-------------------------------|---------------------------|-----------------------------------------------------------------------------------------------------------------------------------------------------------------------------|
| 14 | Phase III trial of low-level laser therapy to prevent oral mucositis in head and neck cancer patients treated with concurrent chemoradiation                | Antunes, HS. et al. (2013). | 68 (8,3) | 73 (8,8) | 113 (12,3) | 10.1016/j.radonc.2013.08.010  | Randomized clinical trial | Randomized clinical study evaluating low-level laser therapy in the prevention of oral mucositis in head and neck cancer patients undergoing chemotherapy and radiotherapy. |
| 15 | Oral mucositis prevention by low-level laser therapy in head-and-neck cancer patients undergoing concurrent chemoradiotherapy: a phase III randomized study | de Lima, AG. et al. (2012)  | 65 (7,2) | 69       | 118 (12,8) | 10.1016/j.ijrobp.2010.10.012  | Randomized clinical trial | Randomized clinical study that evaluating low-level laser therapy in the prevention of chemotherapy-induced oral mucositis in head and neck cancer patients.                |
| 16 | Low-level Infrared Laser Therapy in Chemotherapy-induced Oral Mucositis A Randomized Placebo-controlled Trial in Children                                   | Kuhn, A. et al. (2009)      | 65 (5,2) | 75 (5,9) | 148 (11,8) | 10.1097/MPH.0b013e318192cb8e. | Randomized clinical trial | Randomized clinical study that evaluating low-level laser therapy in the treatment of chemotherapy-induced oral mucositis in pediatric patients.                            |
| 17 | Effect of low level helium-neon (He-Ne) laser therapy in the prevention & treatment of radiation induced mucositis in head & neck cancer patients           | Maiya, GA. et al. (2006)    | 63 (4,2) | -        | 155 (10,2) | -                             | Randomized clinical trial | Randomized clinical study that evaluating low-level laser therapy for the prevention and treatment of oral mucositis in head and neck cancer patients.                      |
| 18 | The Prevention of Induced Oral Mucositis with Low-Level Laser Therapy in Bone Marrow Transplantation Patients: A Randomized Clinical Trial                  | Silva, GBL. et al. (2011)   | 63 (6,2) | 64 (6,3) | 108 (10,8) | 10.1089/pho.2009.2699         | Randomized clinical trial | Randomized clinical trial evaluating low-level laser therapy in the prevention of oral mucositis in hematopoietic cell transplant patients.                                 |
| 19 | Evaluation of low-level laser therapy in the prevention and                                                                                                 | Carvalho, PAG. et al.       | 62 (6,2) | 70 (6,9) | 141 (14,1) | 10.1016/j.oraloncology.20     | Randomized                | Randomized clinical study that evaluating low-level laser therapy in the prevention                                                                                         |

|    |                                                                                                                                                                                                 |                              |          |          |            |                              |                           |                                                                                                                                                                           |
|----|-------------------------------------------------------------------------------------------------------------------------------------------------------------------------------------------------|------------------------------|----------|----------|------------|------------------------------|---------------------------|---------------------------------------------------------------------------------------------------------------------------------------------------------------------------|
|    | treatment of radiation-induced mucositis: A double-blind randomized study in head and neck cancer patients                                                                                      | (2011)                       |          |          |            | 11.08.021                    | clinical trial            | and treatment of radiotherapy-induced oral mucositis in head and neck cancer patients.                                                                                    |
| 20 | Low-level laser therapy in the prevention and treatment of chemotherapy-induced oral mucositis in young patients                                                                                | Abramoff, MMF. et al. (2008) | 62 (4,7) | 70 (5,3) | 138 (9,8)  | 10.1089/pho.2007.2144        | Randomized clinical trial | Randomized clinical trial that evaluating low-level laser therapy in the prevention of oral mucositis.                                                                    |
| 21 | Influence of low-energy laser in the prevention of oral mucositis in children with cancer receiving chemotherapy                                                                                | Cruz, LB. et al. (2007)      | 61 (4,2) | 70 (4,7) | 143 (10)   | 10.1002/pbc.20943            | Randomized clinical trial | Randomized clinical study evaluating low-level laser therapy in the prevention of oral mucositis in patients undergoing head and neck radiotherapy.                       |
| 22 | Effect of low-level laser therapy on patient reported measures of oral mucositis and quality of life in head and neck cancer patients receiving chemoradiotherapy-a randomized controlled trial | Gautam, AP. et al. (2013)    | 57 (6,8) | 62 (7,5) | 120 (14,3) | 10.1007/s00520-012-1684-4    | Randomized clinical trial | Randomized clinical study that evaluating low-level laser therapy and the quality of life of patients with head and neck cancer undergoing chemotherapy and radiotherapy. |
| 23 | Low level laser therapy for concurrent chemoradiotherapy induced oral mucositis in head and neck cancer patients - A triple blinded randomized controlled trial                                 | Gautam, AP. et al. (2012)    | 55 (6)   | 64 (7,1) | 125 (13,6) | 10.1016/j.radonc.2012.06.011 | Randomized clinical trial | Randomized clinical study evaluating low-level laser therapy in the treatment of oral mucositis in a patient undergoing chemotherapy and head and neck radiotherapy.      |
| 24 | Effects of Low-Level Laser Therapy on Collagen                                                                                                                                                  | Lopes, NNF. et al. (2010)    | 54 (4,8) | 55 (5)   | 89 (7,1)   | 10.1002/lsm.20920            | In vitro experimental     | Experimental in vitro study that evaluating the effectiveness of laser therapy on                                                                                         |

|    |                                                                                                                                                                                                          |                               |           |          |            |                                    |                               |                                                                                                                                                                                   |
|----|----------------------------------------------------------------------------------------------------------------------------------------------------------------------------------------------------------|-------------------------------|-----------|----------|------------|------------------------------------|-------------------------------|-----------------------------------------------------------------------------------------------------------------------------------------------------------------------------------|
|    | Expression and Neutrophil Infiltrate in 5-Fluorouracil-Induced Oral Mucositis in Hamsters                                                                                                                |                               |           |          |            |                                    | study                         | collagen expression and treatment of chemically-induced oral mucositis by 5-Fluorouracil in Hamsters.                                                                             |
| 25 | Long-term survival of a randomized phase III trial of head and neck cancer patients receiving concurrent chemoradiation therapy with or without low-level laser therapy (LLLT) to prevent oral mucositis | Antunes, HS. et al. (2017)    | 53 (12,2) | -        | 88 (20,5)  | 10.1016/j.oraloncology.2017.05.018 | Randomized clinical trial     | Randomized clinical study comparing the action of low-level laser therapy versus the absence of treatment in oral mucositis in patients with head and neck cancer.                |
| 26 | Effects of laser irradiation at different wavelengths (660, 810, 980, and 1,064 nm) on mucositis in an animal model of wound healing                                                                     | Usumez, A. et al. (2014)      | 52 (7,2)  | -        | 110 (15,7) | 10.1007/s10103-013-1336-z          | In vitro experimental study   | Experimental study that evaluating the many different potencies of low-level laser therapy in the treatment of chemically induced oral mucositis in rats.                         |
| 27 | Chemotherapy- and radiotherapy-induced mucositis in head and neck cancer patients: new trends in pathophysiology, prevention and treatment                                                               | Bensadoun, R.J. et al. (2001) | 50 (2,5)  | 57 (2,8) | 145 (7,2)  | 10.1007/s004050100368              | Literature review             | Literature review that evaluating the role of laser therapy as a new treatment for oral mucositis in patients with head and neck cancer undergoing chemotherapy and radiotherapy. |
| 28 | Patients with moderate chemotherapy-induced mucositis: pain therapy using low intensity lasers                                                                                                           | Nes, AG. (2005)               | 49 (3)    | 59 (3,6) | 116 (7,1)  | 10.1111/j.1466-7657.2004.00401.x   | Non-randomized clinical study | Clinical study evaluating low-level laser therapy for pain control in oral mucositis in patients undergoing chemotherapy and radiotherapy.                                        |
| 29 | Pilot study of laser effects on oral mucositis in patients receiving chemotherapy                                                                                                                        | Wong, SF. (2002)              | 49 (2,5)  | 57 (3)   | 110 (5,7)  | 10.1097/00130404-200205000-00008   | Pilot clinical study          | Clinical study evaluating the effects of low-level laser therapy on oral mucositis in patients undergoing chemotherapy and radiotherapy.                                          |

|    |                                                                                                                                                                           |                                    |          |           |           |                                  |                               |                                                                                                                                                                                               |
|----|---------------------------------------------------------------------------------------------------------------------------------------------------------------------------|------------------------------------|----------|-----------|-----------|----------------------------------|-------------------------------|-----------------------------------------------------------------------------------------------------------------------------------------------------------------------------------------------|
| 30 | Effect of Low-Level Laser Therapy on Chemoradiotherapy-Induced Oral Mucositis and Salivary Inflammatory Mediators in Head and Neck Cancer Patients                        | Oton-Leite, AF. et al. (2015).     | 48 (7,5) | 51 (8)    | 82 (13)   | 10.1002/lsm.22349                | Randomized clinical study     | Randomized clinical study evaluating the action of low-level laser therapy in the treatment of oral mucositis in patients with head and neck cancer undergoing chemotherapy and radiotherapy. |
| 31 | The use of low-energy laser (LEL) for the prevention of chemotherapy- and/or radiotherapy-induced oral mucositis in cancer patients: results from two prospective studies | Genot-Klastersky, M. et al. (2017) | 45 (3,4) | -         | 80 (6,1)  | 10.1007/s00520-008-0439-8        | Randomized clinical trial     | Randomized clinical study evaluating low-level laser therapy as prevention of oral mucositis in head and neck cancer patients undergoing chemotherapy and radiotherapy.                       |
| 32 | Use of 660-nm Diode Laser in the Prevention and Treatment of Human Oral Mucositis Induced by Radiotherapy and Chemotherapy                                                | Zanin, T. et al. (2010)            | 43 (3,9) | 46 (4,1)  | 80 (7,1)  | 10.1089=photo.2008.2242          | Non-randomized clinical study | Clinical study evaluating the preventive action of low-level laser therapy on oral mucositis in patients receiving chemotherapy and radiotherapy for the treatment of head and neck cancer.   |
| 33 | Low-intensity red laser on the prevention and treatment of induced-oral mucositis in hamsters                                                                             | Franca, CM. et al. (2009)          | 42 (3,4) | 47 (3,9)  | 97 (8)    | 10.1016/j.jphotobiol.2008.09.006 | In vitro experimental study   | Experimental in vitro study that evaluating the action of low-level laser therapy in the prevention of chemically induced oral mucositis in hamsters.                                         |
| 34 | Low-energy laser therapy for prevention of oral mucositis in hematopoietic stem cell transplantation                                                                      | Jaguar, GC. et al. (2007)          | 39 (2,7) | 46 (3,2)  | 81 (5,7)  | 10.1111/j.1601-0825.2006.01330.x | Non-randomized clinical study | Clinical study that evaluating laser therapy in the prevention of oral mucositis in hematopoietic cell transplant patients.                                                                   |
| 35 | The use of low-level light therapy in supportive care for patients with breast cancer:                                                                                    | Robijns, J. et al. (2017)          | 39 (9,2) | 42 (10,5) | 63 (15,5) | 10.1007/s10103-016-              | Literature review             | Literature review on the action of low-level laser therapy on oral mucositis in patients                                                                                                      |

| review of the literature |                                                                                                                                                              |                              |           |          | 2056-y10  | undergoing cancer treatment.       |                                      |                                                                                                                                                                              |
|--------------------------|--------------------------------------------------------------------------------------------------------------------------------------------------------------|------------------------------|-----------|----------|-----------|------------------------------------|--------------------------------------|------------------------------------------------------------------------------------------------------------------------------------------------------------------------------|
| 36                       | Effect of low-level laser therapy on inflammatory mediator release during chemotherapy-induced oral mucositis: a randomized preliminary study                | Silva, GBL. et al. (2015)    | 38 (6,3)  | 41       | 74 (12)   | 10.1007/s10103-014-1624-2          | Randomized clinical trial            | Randomized clinical study that evaluating the action of low-level laser therapy in anti-inflammatory potential and the treatment of oral mucositis in chemotherapy patients. |
| 37                       | Low-level laser for prevention and therapy of oral mucositis induced by chemotherapy or radiotherapy                                                         | Genot, MT. et al. (2005)     | 36 (2,2)  | 52 (3,2) | 107 (6,6) | 10.1097/01.co.0000156196.22249.76  | Literature review                    | Literature review on the action of low-level laser therapy in the prevention of oral mucositis in patients undergoing chemotherapy and radiotherapy.                         |
| 38                       | Cost-effectiveness of the introduction of specialized oral care with laser therapy in hematopoietic stem cell transplantation                                | Bezinelli, LM. et al. (2014) | 38 (5,1)  | 40 (5,5) | 76 (9,5)  | 10.1002/hon.2050                   | Case-control                         | Retrospective case-control study evaluating the action of low-level laser therapy in the treatment of oral mucositis in hematopoietic cell transplant patients.              |
| 39                       | A systematic review and meta-analysis of the effect of low-level laser therapy (LLLT) on chemotherapy-induced oral mucositis in pediatric and young patients | He, MX. et al. (2018)        | 37 (11,6) | -        | 76 (22,6) | 10.1007/s00431-017-3043-4          | Systematic review with meta-analysis | Systematic review that evaluates the action of low-level laser therapy on oral mucositis in chemotherapy patients.                                                           |
| 40                       | Effect of Class IV Laser Therapy on Chemotherapy-Induced Oral Mucositis A Clinical and Experimental Study                                                    | Ottaviani, G. et al. (2013)  | 36 (4,1)  | 39 (4,7) | 71 (8,3)  | 10.1016/j.ajp.ath.2013.09.003      | In vitro experimental study          | Experimental in vitro study that evaluated the efficacy of low-frequency laser therapy in a model of oral mucositis in animals that obtained a chemotherapy regimen.         |
| 41                       | Low Level Helium Neon Laser therapy for chemoradiotherapy induced                                                                                            | Gautam, AP. et al. (2012)    | 33 (3,6)  | 32 (3,5) | 70 (7,7)  | 10.1016/j.oraloncology.2012.03.008 | Randomized clinical trial            | Randomized clinical study evaluating the action of low-level laser therapy in the treatment of oral mucositis in patients with                                               |

|    |                                                                                                                                                        |                               |          |          |           |                                  |                               |                                                                                                                                                                                                |                                                                |
|----|--------------------------------------------------------------------------------------------------------------------------------------------------------|-------------------------------|----------|----------|-----------|----------------------------------|-------------------------------|------------------------------------------------------------------------------------------------------------------------------------------------------------------------------------------------|----------------------------------------------------------------|
|    | oral mucositis in oral cancer patients - A randomized controlled trial                                                                                 |                               |          |          |           |                                  |                               |                                                                                                                                                                                                | head and neck cancer undergoing chemotherapy and radiotherapy. |
| 42 | Effect of intraoral low-level laser therapy on quality of life of patients with head and neck cancer undergoing radiotherapy                           | Oton-Leite, AF. et al. (2012) | 32 (3,5) | 35 (3,8) | 56 (6,1)  | 10.1002/hed.21737                | Randomized clinical trial     | Randomized clinical study evaluating the action of low-level laser therapy in the treatment of oral mucositis in patients with head and neck cancer undergoing radiotherapy.                   |                                                                |
| 43 | Low level laser therapy against radiation induced oral mucositis in elderly head and neck cancer patients-a randomized placebo controlled trial        | Gautam, AP. et al. (2015)     | 30 (5)   | 33 (5,1) | 66 (10,8) | 10.1016/j.jphotobiol.2015.01.011 | Randomized clinical trial     | Randomized clinical study evaluating the action of low-level laser therapy in the prevention of oral mucositis in head and neck cancer patients receiving chemotherapy and radiotherapy.       |                                                                |
| 44 | Biomodulation of Inflammatory Cytokines Related to Oral Mucositis by Low-Level Laser Therapy                                                           | Basso, FG. et al. (2015)      | 30 (5)   | 30 (5)   | 54 (7,5)  | 10.1111/php.12445                | In vitro experimental study   | Experimental in vitro study evaluated the effects of low-level laser therapy on the expression of inflammatory cytokines related to the development of oral mucositis by gingival fibroblasts. |                                                                |
| 45 | Low-level laser therapy for treatment of chemotherapy-induced oral mucositis in childhood: a randomized double-blind controlled study                  | Amadori, F. et al. (2016)     | 29 (5,8) | 31 (6)   | 67 (9,8)  | 10.1007/s10103-016-1975-y        | Randomized clinical trial     | Randomized clinical study evaluating the action of low-level laser therapy in the treatment of oral mucositis in patients with head and neck cancer undergoing chemotherapy and radiotherapy.  |                                                                |
| 46 | Oral mucositis in pediatric patients undergoing hematopoietic stem cell transplantation: Clinical outcomes in a context of specialized oral care using | Eduardo, FD. et al. (2015)    | 29 (4,6) | 30 (4,8) | 53 (8,3)  | 10.1089/pho.2007.2225            | Non-randomized clinical study | Clinical study evaluating the action of low-level laser therapy in the treatment of oral mucositis in hematopoietic cell transplant patients.                                                  |                                                                |

|                         |                                                                                                                                                       |                                       |          |          |           |                                    |                               |                                                                                                                                                                                               |
|-------------------------|-------------------------------------------------------------------------------------------------------------------------------------------------------|---------------------------------------|----------|----------|-----------|------------------------------------|-------------------------------|-----------------------------------------------------------------------------------------------------------------------------------------------------------------------------------------------|
| low-level laser therapy |                                                                                                                                                       |                                       |          |          |           |                                    |                               |                                                                                                                                                                                               |
| 47                      | Severity of Oral Mucositis in Patients Undergoing Hematopoietic Cell Transplantation and an Oral Laser Phototherapy Protocol: A Survey of 30 Patients | Eduardo, FD. et al. (2009)            | 28 (2,3) | 31 (2,5) | 69 (5,3)  | 10.1089/pho.2007.2225              | Non-randomized clinical study | Clinical study evaluating the action of low-level laser therapy in the treatment of oral mucositis in hematopoietic cell transplant patients.                                                 |
| 48                      | Cost-effectiveness of low-level laser therapy (LLLT) in head and neck cancer patients receiving concurrent chemoradiation                             | Antunes, HS. et al. (2016)            | 28 (5,4) | -        | 52 (9,4)  | 10.1016/j.oraloncology.2015.10.022 | Randomized clinical trial     | Randomized clinical study evaluating the action of low-level laser therapy in the treatment of oral mucositis in patients with head and neck cancer undergoing chemotherapy and radiotherapy. |
| 49                      | Efficacy of low-level laser therapy as an auxiliary tool for management of acute side effects of head and neck radiotherapy                           | Gonzalez-Arriagada, WA. et al. (2018) | 23 (7,3) | 24 (8)   | 43 (13,3) | 10.1080/14764172.2017.1376097      | Case-control                  | Retrospective case-control study evaluating the efficacy of low-level laser therapy as an adjunct treatment of oral mucositis in head and neck cancer patients.                               |
| 50                      | Low-level laser therapy prevents severe oral mucositis in patients submitted to hematopoietic stem cell transplantation: a randomized clinical trial  | Ferreira, B. et al. (2016)            | 22 (4,4) | 22 (9,6) | 47 (4,2)  | 10.1007/s00520-015-2881-8          | Randomized clinical trial     | Randomized clinical study evaluating low-level laser therapy in the prevention of severe oral mucositis in patients undergoing hematopoietic cell transplantation.                            |
